# Supplementary material
Source: PubMed Central journal article supplement (PMC5736819)
Supplement: IAI.00631-17_zii999092268s1.pdf [file IAI.00631-17_zii999092268s1.pdf]

1 **SUPPLEMENTAL MATERIAL**

2 **Supplemental Table 1.** Average gene copy per NCBI Staphylococcal Genomes

3 analyzed for P<sub>i</sub> transporters.

| Species                                | No. of Genomes | <i>pstS</i> | <i>pstC</i> | <i>pstA</i> | <i>pstB</i> | <i>pit</i> | <i>nptA</i> | <i>phoU</i> | <i>phoB1</i> | <i>phoR</i> |
|----------------------------------------|----------------|-------------|-------------|-------------|-------------|------------|-------------|-------------|--------------|-------------|
| <i>Staphylococcus lutrae</i>           | 1              | 1           | 1           | 1           | 1           | 1          | 1           | 2           | 1            | 1           |
| <i>Staphylococcus pseudintermedius</i> | 11             | 1           | 1           | 1           | 1           | 1          | 1           | 2           | 1            | 1           |
| <i>Staphylococcus delphini</i>         | 1              | 1           | 1           | 1           | 1           | 1          | 1           | 2           | 1            | 1           |
| <i>Staphylococcus intermedius</i>      | 2              | 1           | 1           | 1           | 1           | 1          | 1           | 2           | 1            | 1           |
| <i>Staphylococcus schleiferi</i>       | 5              | 1           | 1           | 1           | 1           | 1          | 1           | 2           | 1            | 1           |
| <i>Staphylococcus agnetis</i>          | 4              | 1           | 1           | 1           | 1           | 1          | 1           | 2           | 1            | 1           |
| <i>Staphylococcus hyicus</i>           | 1              | 1           | 1           | 1           | 1           | 1          | 1           | 2           | 1            | 1           |
| <i>Staphylococcus chromogenes</i>      | 1              | 1           | 1           | 1           | 1           | 1          | 1           | 2           | 1            | 1           |
| <i>Staphylococcus microti</i>          | 1              | 0           | 0           | 0           | 0           | 1          | 1           | 1           | 1            | 1           |
| <i>Staphylococcus massiliensis</i>     | 2              | 1           | 1           | 1           | 1           | 1          | 1           | 2           | 1            | 1           |
| <i>Staphylococcus capitis</i>          | 37             | 1           | 1           | 1           | 1           | 1          | 0           | 2           | 1            | 1           |
| <i>Staphylococcus caprae</i>           | 2              | 1           | 1           | 1           | 1           | 1          | 0           | 2           | 1            | 1           |
| <i>Staphylococcus epidermidis</i>      | 372            | 1           | 0.99        | 1           | 0.99        | 0.99       | 0           | 1.99        | 1            | 0.99        |
| <i>Staphylococcus lugdunensis</i>      | 12             | 1           | 1           | 1           | 1           | 1          | 0           | 2           | 0.92         | 1           |
| <i>Staphylococcus</i>                  | 42             | 1           | 1           | 0.98        | 1           | 1          | 0           | 2           | 1            | 1           |
| <i>Staphylococcus haemolyticus</i>     | 159            | 1           | 1           | 1           | 0.99        | 1          | 0           | 2           | 1            | 1           |
| <i>Staphylococcus warneri</i>          | 19             | 1           | 1           | 1           | 1           | 1          | 0           | 2           | 1            | 1           |
| <i>Staphylococcus pasteurii</i>        | 3              | 1           | 1           | 1           | 1           | 1          | 0           | 2           | 1            | 1           |
| <i>Staphylococcus simiae</i>           | 1              | 1           | 1           | 1           | 1           | 1          | 0           | 2           | 1            | 1           |
| <i>Staphylococcus schweitzeri</i>      | 3              | 1           | 1           | 1           | 1           | 1          | 1           | 2           | 1            | 1           |
| <i>Staphylococcus argenteus</i>        | 106            | 1           | 1           | 1           | 1           | 1          | 1           | 2           | 1            | 0.99        |
| <i>Staphylococcus aureus</i>           | 7792           | 0.99        | 1           | 1           | 1           | 1          | 0.99        | 2           | 1            | 1           |
| <i>Staphylococcus pettenkoferi</i>     | 4              | 1           | 1           | 1           | 1           | 1          | 0           | 2           | 1            | 1           |
| <i>Staphylococcus auricularis</i>      | 1              | 1           | 1           | 1           | 1           | 1          | 1           | 2           | 1            | 1           |
| <i>Staphylococcus equorum</i>          | 21             | 1           | 1           | 1           | 1           | 1          | 1           | 2           | 1            | 1           |
| <i>Staphylococcus cohnii</i>           | 14             | 1           | 1           | 1           | 1           | 1          | 1           | 2           | 1            | 1           |
| <i>Staphylococcus saprophyticus</i>    | 40             | 1           | 1           | 1           | 1           | 1          | 0.88        | 2           | 1            | 1           |
| <i>Staphylococcus xylosus</i>          | 14             | 1           | 1           | 1           | 1           | 1          | 1           | 2           | 1            | 1           |
| <i>Staphylococcus succinus</i>         | 4              | 1           | 1           | 1           | 1           | 1          | 1           | 2           | 1            | 1           |
| <i>Staphylococcus gallinarum</i>       | 1              | 1           | 1           | 1           | 1           | 1          | 0           | 2           | 1            | 1           |
| <i>Staphylococcus arlettae</i>         | 1              | 1           | 1           | 1           | 1           | 1          | 1           | 2           | 1            | 1           |
| <i>Staphylococcus simulans</i>         | 5              | 1           | 1           | 1           | 1           | 1          | 0           | 2           | 1            | 1           |
| <i>Staphylococcus condimentii</i>      | 3              | 1           | 1           | 1           | 1           | 1          | 0           | 2           | 1            | 1           |
| <i>Staphylococcus carnosus</i>         | 4              | 1           | 1           | 1           | 1           | 1          | 0           | 2           | 1            | 1           |
| <i>Staphylococcus lentus</i>           | 4              | 1           | 1           | 1           | 1           | 1          | 1           | 2           | 1            | 1           |
| <i>Staphylococcus sciuri</i>           | 15             | 1           | 1           | 1           | 1           | 1          | 1           | 2           | 1            | 1           |
| <i>Staphylococcus vitulinus</i>        | 1              | 1           | 1           | 1           | 1           | 1          | 1           | 2           | 1            | 1           |
| <i>Staphylococcus fleurettii</i>       | 1              | 1           | 1           | 1           | 1           | 1          | 1           | 2           | 1            | 1           |

Fractional numbers are mostly artifacts of incomplete genomes sequences, except for *S. saprophyticus*, of which 5 strains have partial gene deletions of *nptA*

5 **Supplemental Table 2.** Inorganic phosphate transporters, phosphate regulatory, and universally conserved gene  
6 queries.

| Gene name(s)       | HMM(s)                                   | KEGG Orthology | Gene description                                                                          | <i>E. coli</i> <sup>a</sup> | <i>V. cholerae</i> <sup>b</sup> | <i>B. subtilis</i> <sup>c</sup> | <i>S. aureus</i> <sup>d</sup> |
|--------------------|------------------------------------------|----------------|-------------------------------------------------------------------------------------------|-----------------------------|---------------------------------|---------------------------------|-------------------------------|
| <i>pstB</i>        | TIGR00972, PF00005                       | K02036         | phosphate transport system ATP-binding protein                                            | b3725                       | VC0726, VCA0073                 | BSU24950, BSU24960              | NWMN_1297                     |
| <i>pstA</i>        | TIGR00974, PF00528                       | K02038         | phosphate transport system permease protein                                               | b3726                       | VC0725, VCA0072                 | BSU24970                        | NWMN_1298                     |
| <i>pstC</i>        | TIGR02138, PF00528                       | K02037         | phosphate transport system permease protein                                               | b3727                       | VC0724, VCA0071                 | BSU24980                        | NWMN_1299                     |
| <i>pstS</i>        | TIGR02136, TIGR00975, TIGR04505, PF12849 | K02040         | phosphate transport system substrate-binding protein                                      | b3728                       | VC0721, VCA0070                 | BSU24990                        | NWMN_1300                     |
| <i>pitA, pitB</i>  | PF01384                                  | K16322         | low-affinity inorganic phosphate transporter                                              | b2987, b3493                | –                               | –                               | –                             |
| <i>pit</i>         | PF01384                                  | K03306         | inorganic phosphate transporter, PiT family                                               | –                           | VC2442                          | BSU12840                        | NWMN_0633                     |
| <i>yjbB</i>        | TIGR01013, TIGR00704, PF02690, PF01895   | K03324         | phosphate:Na <sup>+</sup> symporter                                                       | b4020                       | –                               | BSU25420                        | NWMN_0049                     |
| <i>nptA</i>        | PF02690                                  | K14683         | solute carrier family 34 (sodium-dependent phosphate cotransporter)                       | –                           | VC0676                          | –                               | –                             |
| <i>phoU</i>        | TIGR02135, PF01895                       | K02039         | phosphate transport system regulatory protein                                             | b3724                       | VC0727                          | –                               | NWMN_1296                     |
|                    | TIGR00153, PF01865                       | K07220         | uncharacterized protein with PhoU-like domain                                             | –                           | VC2441                          | BSU12850                        | NWMN_0632                     |
| <i>phoB</i>        | TIGR02154, PF00072, PF00486              | K07657         | two-component system, OmpR family, phosphate regulon response regulator PhoB              | b0399                       | VC0719                          | –                               | –                             |
| <i>phoP, phoB1</i> | phoB1, PF00072, PF00486                  | K07658         | two-component system, OmpR family, alkaline phosphatase synthesis response regulator PhoP | –                           | –                               | BSU29110                        | NWMN_1586                     |
| <i>phoR</i>        | phoR, TIGR02966, PF02518, PF00512        | K07636         | two-component system, OmpR family, phosphate regulon sensor histidine kinase PhoR         | b0400                       | VC0720                          | BSU29100                        | NWMN_1585                     |
| <i>aspS</i>        | TIGR00459                                | K01876         | aspartyl-tRNA synthetase                                                                  | b1866                       | VC1166                          | BSU27550                        | NWMN_1532                     |
|                    |                                          |                | Signal Recognition Particle (SRP) component with 4.5S RNA ( <i>ffs</i> )                  |                             |                                 |                                 |                               |
| <i>ffh</i>         | TIGR00959                                | K03106         | 4.5S RNA ( <i>ffs</i> )                                                                   | b2610                       | VC0560                          | BSU15980                        | NWMN_1147                     |
| <i>fusA</i>        | TIGR00484                                | K02355         | elongation factor G                                                                       | b3340                       | VC0361                          | BSU01120                        | NWMN_0509                     |
| <i>gltX</i>        | TIGR00464                                | K01885         | glutamyl-tRNA synthetase                                                                  | b2400                       | VC2214                          | BSU00920                        | NWMN_0490                     |
|                    |                                          |                | fused protein chain initiation factor 2, IF2: membrane protein/conserved protein          |                             |                                 |                                 |                               |
| <i>infB</i>        | TIGR00487                                | K02519         | fused protein chain initiation factor 2, IF2: membrane protein/conserved protein          | b3168                       | VC0643                          | BSU16630                        | NWMN_1178                     |
| <i>leuS</i>        | TIGR00396                                | K01869         | leucyl-tRNA synthetase                                                                    | b0642                       | VC0956                          | BSU30320                        | NWMN_1651                     |
| <i>rplB</i>        | TIGR01171                                | K02886         | 50S ribosomal subunit protein L2                                                          | b3317                       | VC2593                          | BSU01190                        | NWMN_2149                     |
| <i>rpoB</i>        | TIGR02013                                | K03043         | RNA polymerase, beta subunit                                                              | b3987                       | VC0328                          | BSU01070                        | NWMN_0504                     |
| <i>rpsE</i>        | TIGR01021                                | K02988         | 30S ribosomal subunit protein S5                                                          | b3303                       | VC2579                          | BSU01330                        | NWMN_2135                     |
| <i>rpsH</i>        | PF00410                                  | K02994         | 30S ribosomal subunit protein S8                                                          | b3306                       | VC2582                          | BSU01300                        | NWMN_2138                     |
| <i>rpsK</i>        | PF00411                                  | K02948         | 30S ribosomal subunit protein S11                                                         | b3297                       | VC2573                          | BSU01420                        | NWMN_2127                     |
| <i>topA</i>        | TIGR01051                                | K03168         | DNA topoisomerase I                                                                       | b1274                       | VC1730                          | BSU16120                        | NWMN_1160                     |
| <i>tufA</i>        | TIGR00485                                | K02358         | elongation factor Tu                                                                      | b3339                       | VC0362                          | BSU01130                        | NWMN_0510                     |

7 Strains <sup>a</sup>*Escherichia coli* K-12 MG1655, <sup>b</sup>*Vibrio cholerae* O1 biovar El Tor N16961, <sup>c</sup>*Bacillus subtilis* subsp. *subtilis* 168, <sup>d</sup>*Staphylococcus aureus* subsp. *aureus* Newman

8 **Supplemental Table 3.** PCR primers used in this study.

| Name         | Sequence                                                   |
|--------------|------------------------------------------------------------|
| pst KO 5'F   | GACGACAAGTTTGTACAAAAAAGCAGGCTGAATAGGCTGGGACATTAAGTTCTTAGGC |
| pst KO 5'R   | TCAACCAAACCTTCCTGAAAATTGCCATTTTTTCATTGAAATATCC             |
| pst KO 3'F   | ATGAAAAAATGGCAATTTTCAGGAAGGTTTGGTTGATATATAATGGC            |
| pst KO 3'R   | GGGGACCACTTTGTACAAGAAAGCTGGGTCAGGTGTAGACATTACTACAGAACAGCC  |
| nptA KO 5'F  | GGGGACAAGTTTGTACAAAAAAGCAGGCTGACCCACTTGCAGGCAAAACAGTTACAG  |
| nptA KO 5'R  | ATTTCTTCATCTGTAGGTACGACATTTCCATTATTTACCTCAAATAAGC          |
| nptA KO 3'F  | GGGGACCACTTTGTACAAGAAAGCTGGGTCGGTGTTCAGGTACATTAATTGTAGCG   |
| nptA KO 3'R  | GGTGAAATAATGAAAATGTCGTACCTACAGATGAAGAAAATTGCAACAAC         |
| pst comp 5'F | CAGTGGTACCGGGAGGATATTTCAATGAAAAAATGGC                      |
| pst comp 5'R | GGACTTATAGCATTAAACTCTCCAAGACCTG                            |
| pst comp 3'F | GGTTTCTTTGCATTAACCTTTGTTACACCAG                            |
| pst comp 3'R | CAGTGAGCTCGCCATTATATATCAACCAAACCTTCC                       |
| pitA comp F  | GCGTGAGCTCGGGGAGTATATATTTATGTCATATATAATCATCG               |
| pitA comp R  | GCGTGGTACCCAATTAGAAAAATAAGTTAAGTATATAGAATAGTAAACC          |
| nptA comp F  | GACGGAGCTCTTGAGGTGAAATAATGGAAATGTCGGTTACA                  |
| nptA comp R  | GATGGAATTCCAGTAAAAATTAATTTTTCAGTTGTTGCAATTTT               |
| pst prom F   | GGGGCTGCAGTACATGTTAATACGTAGTATTAATGGCGAGAC                 |
| pst prom R   | GGGGGGTACCTGAAATATCCTCCCTGTATGAACAACAA                     |
| pitA prom F  | GGGGCTGCAGAATATACAGATGGCTTTCAGTAGAGTAGTGG                  |
| pitA prom R  | GGGGGGTACCTTAAAAATCCTCCATTTAAGCGATTGTCACC                  |
| nptA prom F  | GGGGCTGCAGCGAAAACCATTAATAGATTTTTATTTGGTGATTTCAAAT          |
| nptA prom R  | GGGGGGTACCTATTTTACCTCAAATAAGCTTTATATTTAGATTATCGC           |

9

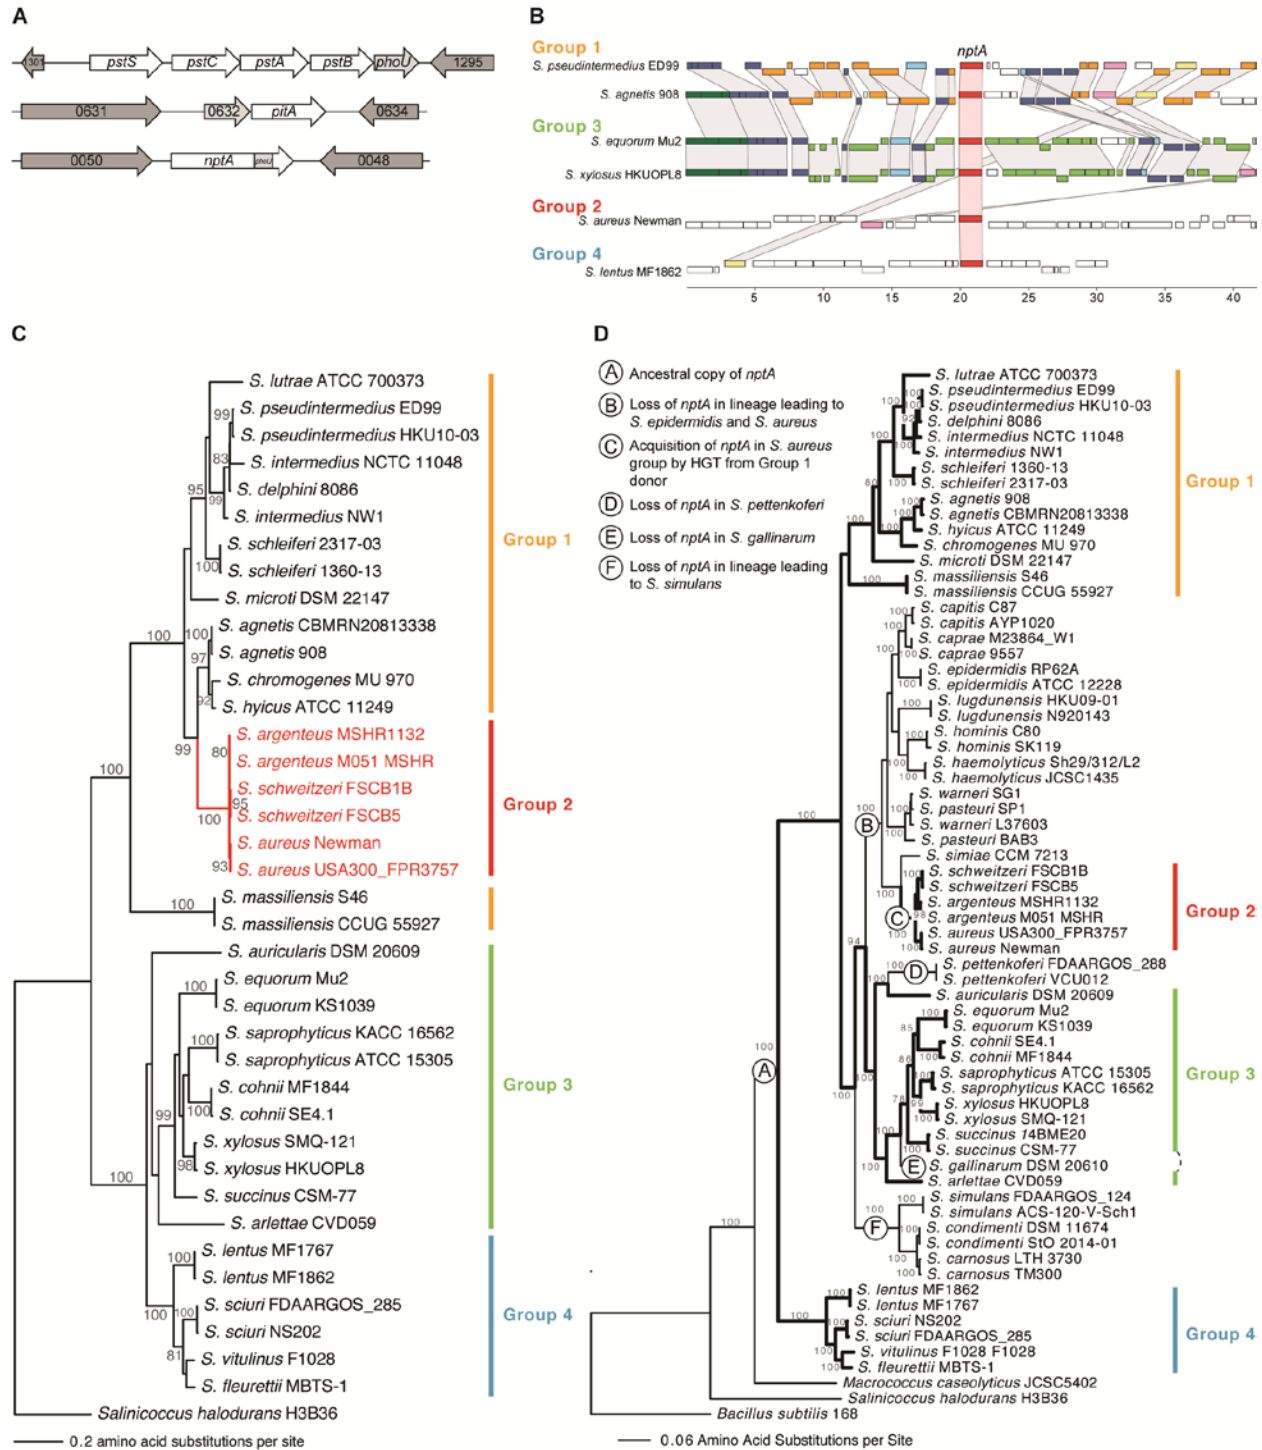

10 Supplemental Figure 1

11 **Supplemental Figure 1. *Staphylococcus aureus* reacquired *nptA* after ancestral**

12 **loss. (A) BLAST analysis of the *S. aureus* Newman genome identified three putative  $P_i$**

13 acquisition system loci: *pstSCAB* (top), *pitA* (middle), and *nptA* (bottom). Structural  
14 genes of the transporters are in white. Each locus contains a *phoU* (light gray) gene  
15 (*pstSCAB* and *pitA*) or domain (*nptA*). Flanking genes are in dark gray. Locus numbers  
16 correspond to the *S. aureus* Newman genome annotation. Genes and intergenic  
17 regions are not drawn to scale. **(B)** Schematic representation of *nptA* encoding regions  
18 from six staphylococcal species aligned with MAUVE illustrates variable syntenic genes  
19 flanking *nptA* (red). Species are assigned groups 1-4 based on the degree of synteny  
20 observed. Colored rectangles are shared homologous genes with greater than 50% nt  
21 identity, white are unique. **(C)** Maximum likelihood phylogeny generated from aligned  
22 Staphylococcal *nptA* alleles suggests *nptA* was present in the common ancestor of the  
23 genus *Staphylococcus* and that presence of *nptA* in *S. aureus* is due to HGT (red). **(D)**  
24 Possible gains and losses of *nptA* in the genus *Staphylococcus* are overlaid on a  
25 maximum likelihood phylogeny for 38 *Staphylococcus* spp. generated from 13  
26 conserved core genes. Thick lines indicate *Staphylococcus* lineages with *nptA* and thin  
27 lines indicate those without. Circled letters indicate predicted gain/loss events based on  
28 parsimony. In **(C)** and **(D)**, branch lengths reflect the number of amino acid substitutions  
29 per site, and bootstrap values  $\geq 75$  are indicated at the relevant nodes.

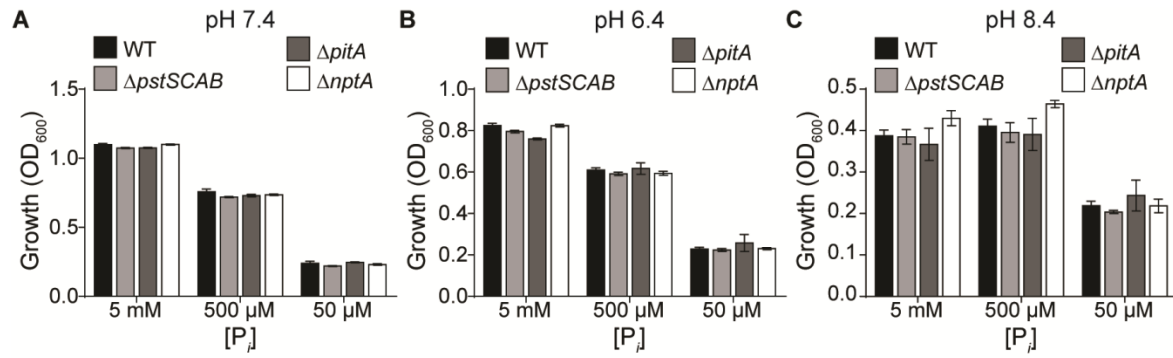

30 Supplemental Figure 2

31 **Supplemental Figure 2. The *S. aureus* P<sub>i</sub> transporters compensate for one another**  
 32 ***in vitro*. A-C.** Growth measured by OD<sub>600</sub> of wild type, ΔpstSCAB, ΔpitA, ΔnptA after 12  
 33 hours in PFM9 supplemented with various P<sub>i</sub> concentrations adjusted to pH 7.4 (A), 6.4  
 34 (B), or 8.4 (C). n=3; error bars indicate SEM.

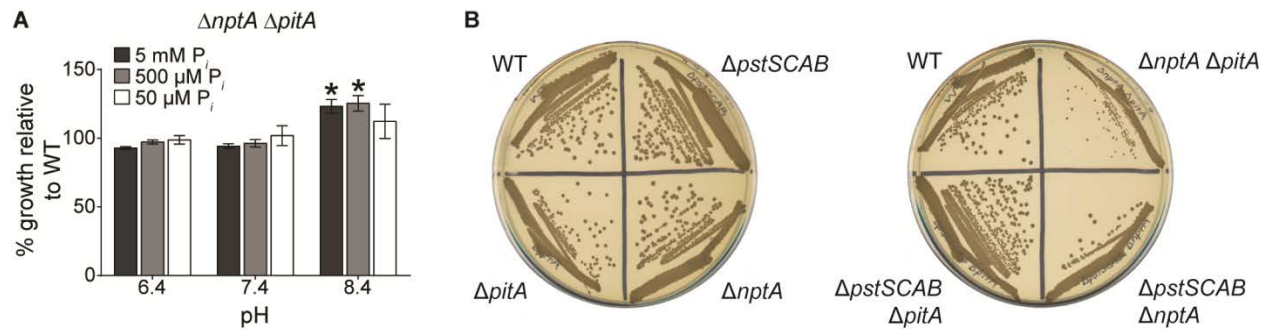

35 Supplemental Figure 3

36 **Supplemental Figure 3. PstSCAB is insufficient for growth of *S. aureus* on rich**

37 **media agar plates. (A)** Growth of *ΔnptA ΔpitA* in PFM9 adjusted to pH 6.4, 7.4, or 8.4

38 with different supplemental  $P_i$  concentrations was measured by  $OD_{600}$  and normalized

39 to wild type.  $n=3$ ; error bars indicate SEM. \* =  $p < 0.05$  compared to wild type via two-

40 way ANOVA with Dunnett's posttest. **(B)** Wild type and the single transporter mutants

41 (*ΔpstSCAB*, *ΔpitA*, and *ΔnptA*) or the double transporter mutants (*ΔnptA ΔpitA*,

42 *ΔpstSCAB ΔpitA*, and *ΔpstSCAB ΔnptA*) were grown on tryptic soy agar plates.

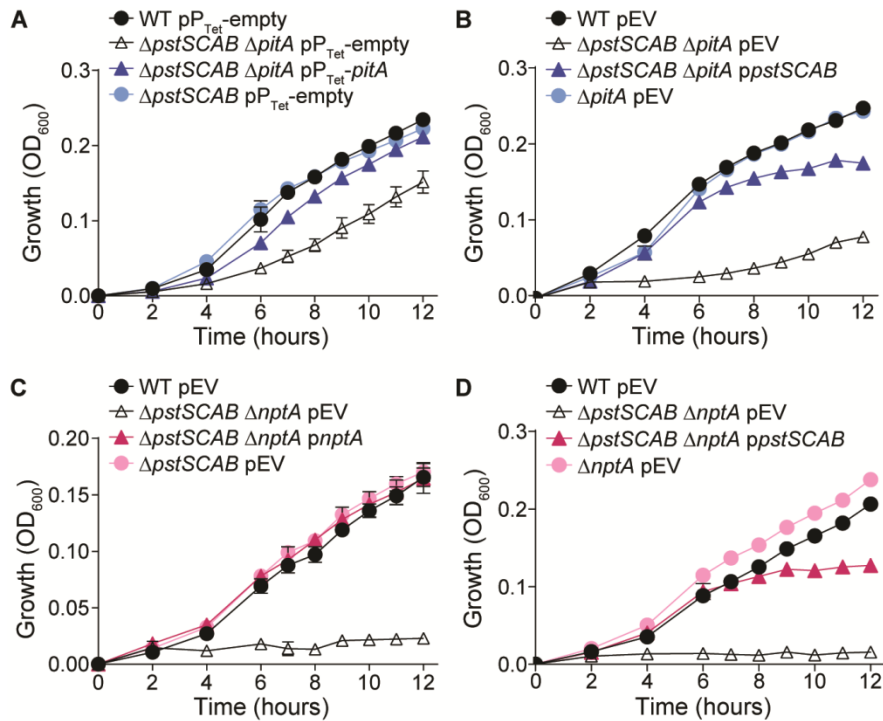

43 Supplemental Figure 4

44 **Supplemental Figure 4. Growth defects of  $\Delta pstSCAB \Delta pitA$  and  $\Delta pstSCAB \Delta nptA$**   
 45 **can be complemented by ectopic expression of either deleted transporter.**

46 **A.** Growth of wild type *S. aureus*,  $\Delta pstSCAB$ , and  $\Delta pstSCAB \Delta pitA$  carrying empty  
 47 vector (pP<sub>Tet</sub>-empty) and  $\Delta pstSCAB \Delta pitA$  carrying pP<sub>Tet</sub>-*pitA* in PFM9, pH 6.4, with 50  
 48  $\mu M P_i$  as measured by OD<sub>600</sub>. n=3; error bars indicate SEM and are frequently smaller  
 49 than the symbols. **B.** Growth of wild type *S. aureus*,  $\Delta pstSCAB$ , and  $\Delta pstSCAB \Delta pitA$   
 50 carrying empty vector (pEV) and  $\Delta pstSCAB \Delta pitA$  carrying *ppstSCAB* in PFM9, pH 6.4,  
 51 with 50  $\mu M P_i$  as measured by OD<sub>600</sub>. n=3; error bars indicate SEM and are frequently  
 52 smaller than the symbols. **C.** Growth of wild type *S. aureus*,  $\Delta pstSCAB$ , and  $\Delta pstSCAB$   
 53  $\Delta nptA$  carrying empty vector (pEV) and  $\Delta pstSCAB \Delta nptA$  carrying *pnptA* in PFM9, pH  
 54 8.4, with 50  $\mu M P_i$  as measured by OD<sub>600</sub>. n=3; error bars indicate SEM and are  
 55 frequently smaller than the symbols. **D.** Growth of wild type *S. aureus*,  $\Delta nptA$ , and



56  $\Delta pstSCAB \Delta nptA$  carrying empty vector (pEV) and  $\Delta pstSCAB \Delta nptA$  carrying  
57  $ppstSCAB$  in PFM9, pH 8.4, with 50  $\mu M$   $P_i$  as measured by  $OD_{600}$ . n=3; error bars  
58 indicate SEM and are frequently smaller than the symbols.

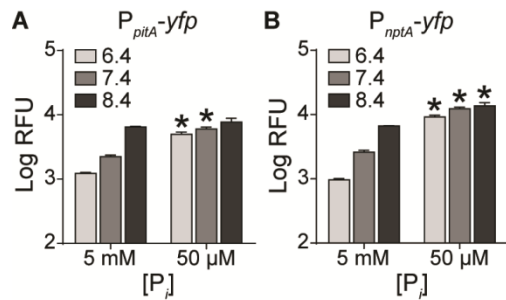

59 Supplemental Figure 5

60 **Supplemental Figure 5. *pitA* and *nptA* are expressed by *S. aureus* independent of**  
 61 **pH. A-B.** Expression of *pitA* (A) and *nptA* (B) after 9 hrs of growth in PFM9  
 62 supplemented with 5 mM (excess) or 50 μM (limiting) P<sub>i</sub> adjusted to pH 6.4, 7.4, or 8.4.  
 63 Expression was assessed using wild type *S. aureus* carrying the reporter plasmids P<sub>*pitA*</sub>-  
 64 *yfp* and P<sub>*nptA*</sub>-*yfp*. \* =  $p < 0.05$  compared to 5 mM P<sub>i</sub> at the same pH via two-way  
 65 ANOVA with Dunnett's posttest. n=3; error bars indicate SEM.

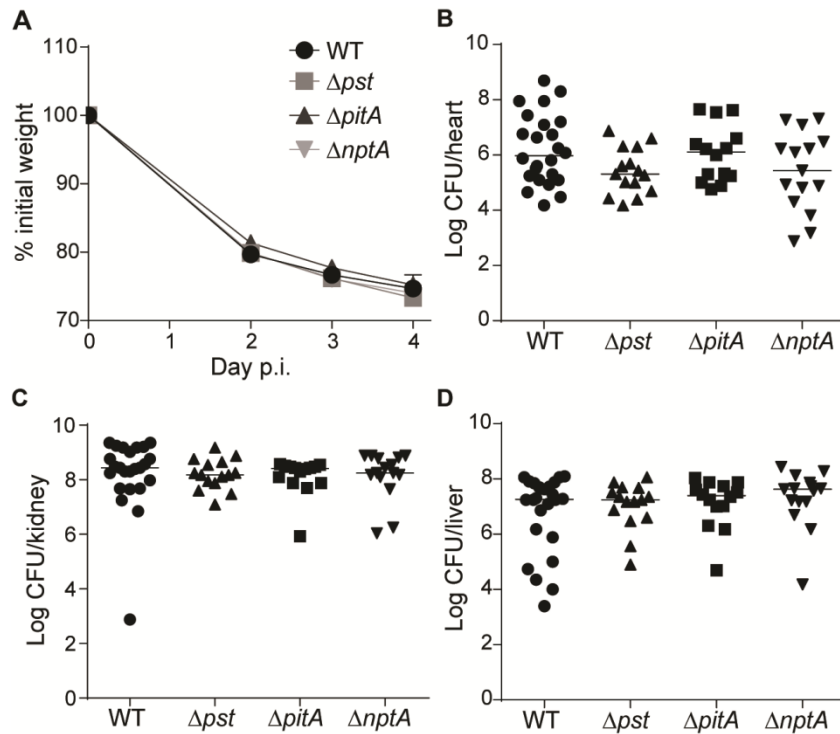

66 Supplemental Figure 6

67 **Supplemental Figure 6. *S. aureus*  $P_i$  transporters compensate for one another in a**  
 68 **systemic mouse model of infection.** Wild type C57BL/6J mice were infected with *S.*  
 69 *aureus* wild type,  $\Delta pstSCAB$ ,  $\Delta pitA$ , and  $\Delta nptA$  ( $\Delta pst = \Delta pstSCAB$ ). Weight loss was  
 70 monitored (**A**) and bacterial burdens in the heart (**B**), kidney (**C**), and liver (**D**) were  
 71 enumerated four days post-infection. Error bars indicate SEM. The lines indicate  
 72 medians. The data are results from three independent experiments.  $n \geq 14$  for each  
 73 group.

74
